# Supplementary material for: Mg–Al layered double hydroxides: a correlation between synthesis-structure and ionic conductivity
Source: Royal Society of Chemistry journal article supplement (doi:10.1039/c4ra05628k), 2014-01-01
Supplement: c4ra05628k1.pdf [file c4ra05628k1.pdf]

## Mg-Al Layered double hydroxides: A correlation between synthesis-structure and ionic conductivity

Peilin Zhang<sup>1</sup>, Takeo Yamaguchi<sup>2</sup>, Balagopal N. Nair<sup>1</sup>, Keita Miyajima<sup>1</sup>, Gopinathan M. Anilkumar<sup>1\*</sup>

<sup>1</sup>Research & Development Center, Noritake, Co., Ltd., 300 Higashiyama, Miyoshi, Aichi 470-0293, Japan

<sup>2</sup>Chemical Resources Laboratory, Tokyo Institute of Technology, R1-17, 4259 Nagatsuta, Midori-ku, Yokohama 226-8503, Japan

### Supplementary Information

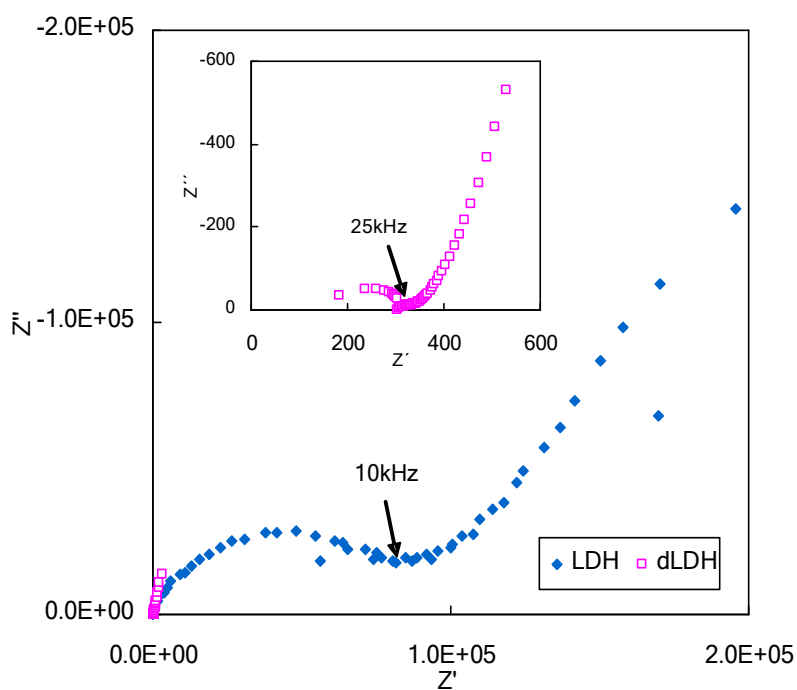

Figure S1 Cole-cole plots of as prepared LDH and delaminated LDH at 80°C R.H. 80%

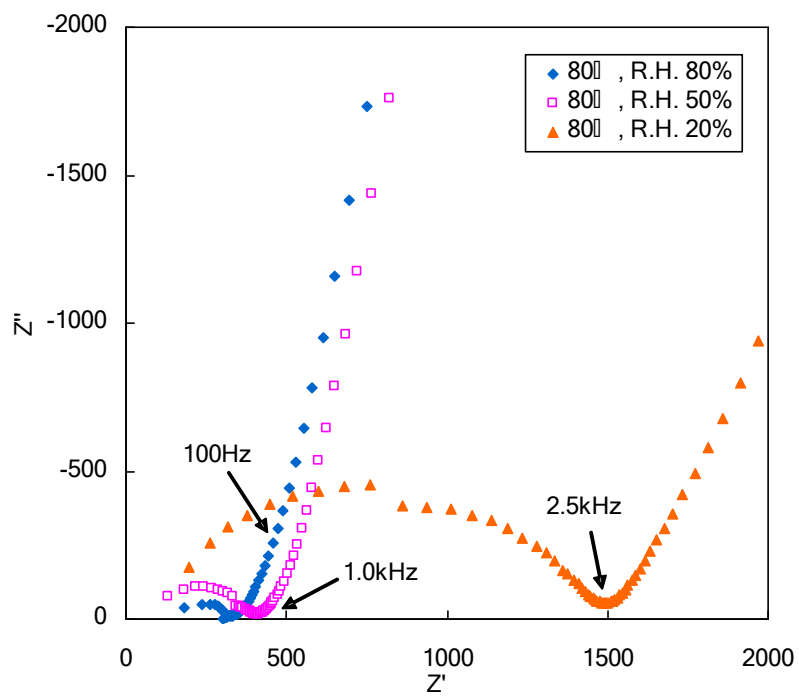

Figure S2 Cole-cole plots of delaminated LDH at 80°C under different relative humidity
